# Supplementary material for: Comparison of Vegan and Non-Vegan Diets on Memory and Sleep Quality
Source: Research Square preprint supplement (doi:10.21203/rs.3.rs-107006/v1), 2020-11-30
Supplement: Supplementary file 2 [file 809e3c0c22ffceb3af1ee69e.xlsx]

## Sheet: Notes
Part Num	participant number
Age Yrs	age in years
Gender	gender
Educ level	level of education 0 to 7 (ascending in same order as form)
Diet	see below
Yrs diet	number of years on current dietary regime
Sleep	score on PSQI (0 to 21)
T1-5	Scaled index score - trials 1 to 5
Delayed	scaled index score - delayed recall
Total	scaled index score - total recall correct									intro	3102
Scaled recog	scaled Y/N rcognition discrim									method	2195
										results	2600
										discussion	2293
Diet category	Vegan	only if stated vegan and Q5, Q6 and Q10 all <1									10190
	Vegetarian	stated vegetarian and Q5 <1 and Q10 <1
	Pescatarian	stated pescatarian and Q5 <1
	Omnivore low
	Omnivore high	Q5 or Q6 or Q10 last box ticked, or Q5 and Q10 second box ticked
2019-08-16	correction made in part 21, recog was 40, should be 10

## Sheet: Data
Part Num	Age Yrs	Gender	Educ level	Diet	Yrs diet	Sleep	T1-5	Delayed	Total	Scaled recog
41	50	F	4	Vegetarian	1.25	9	95	84	91	7
56	77	F	6	Omnivore low		7	110	117	113	12
47	55	F	8	Vegan	2	4	128	132	132	15
37	54	F	2	Vegan	1	7	105	117	112	15
40	68	F	6	Vegan	8	1	129	129	134	15
42	50	M	2	Vegan	2	5	98	92	96	9
51	47	M	7	Omnivore low		8	95	92	94	11
38	52	F	2	Vegan	3	5	118	115	115	12
44	50	M	3	Vegan	2	3	80	94	87	9
45	59	F	5	Vegetarian		8	114	114	114	12
49	59	M	7	Pescatarian	25	9	104	104	108	7
11	46	M	6	Omnivore low		3	114	99	108	9
5	52	M	2	Omnivore low		11	114	93	106	7
12	68	F	5	Omnivore low		1	135	132	135	12
8	47	F	4	Omnivore high		4	124	114	123	11
17	54	M	5	Omnivore low		1	73	69	73	6
9	60	M	7	Omnivore high		8	93	83	91	9
7	54	F	2	Vegan		1	122	125	129	12
6	52	F	3	Vegan		5	120	123	120	15
52	55	F	6	Vegetarian	17	6	118	132	124	15
13	43	M	2	Omnivore high		6	104	96	103	10
53	52	M	7	Pescatarian		3	99	98	98	11
33	73	M	5	Omnivore high		2	115	121	119	12
14	52	F	2	Pescatarian		10	117	120	117	10
32	71	M	5	Omnivore low		4	114	118	117	13
30	75	F	6	Omnivore high		6	129	109	121	11
16	47	M	3	Omnivore low		5	87	89	87	8
29	45	M	0	Omnivore high		14	104	96	98	11
15	66	M	3	Omnivore low		1	111	93	104	10
28	65	F	6	Omnivore low		2	127	124	128	11
36	46	M	7	Omnivore high		4	92	80	90	4
27	63	M	6	Omnivore low		7	113	113	115	11
4	59	M	6	Omnivore high		7	90	80	86	7
31	64	F	7	Omnivore low		1	118	108	118	10
35	63	M	3	Pescatarian		5	120	126	125	11
34	77	F	6	Omnivore low		3	119	120	122	16
20	45	M	2	Omnivore high		5	67	84	76	7
18	43	M	6	Omnivore high		3	118	117	119	14
21	65	M	5	Omnivore high		5	105	79	101	10
48	47	M	5	Vegan	3.5	5	100	104	106	12
43	53	F	3	Pescatarian	1	3	135	132	139	15
55	45	F	7	Pescatarian	30	3	105	104	107	11
39	51	F	3	Vegan	4.5	5	119	120	121	15
50	64	F	7	Omnivore high		5	123	129	129	11
54	62	M	7	Vegetarian	15	6	114	120	116	15
19	57	M	8	Omnivore high		6	127	121	128	15
46	55	F	6	Vegan		2	104	98	103	6
25	49	M	6	Vegan		5	124	132	127	15
22	40	M	2	Omnivore low		6	111	105	112	10
23	54	M	2	Omnivore low		5	109	106	110	11
26	49	F	6	Omnivore low		3	113	111	114	15
1	77	M	6	Vegetarian		14	120	104	114	16
2	45	M	5	Omnivore high		4	83	83	82	4
3	72	F	3	Pescatarian	30	1	140	136	145	16
10	58	M	2	Vegan	4	5	132	127	132	13
60	52	F	4	Vegetarian	20	1	130	132	135	15
61	42	F	6	Pescatarian	20	3	124	118	124	12
57	43	F	7	Pescatarian	6	5	120	132	129	14
58	40	M	7	Vegetarian	3	6	123	129	129	14
59	50	M	7	Omnivore low		5	108	103	106	12
24	55	F	3	Vegan	3	12	111	105	110	7
62	56	F	8	Pescatarian	20	7	91	92	90	9
min	40		0		1	1	67	69	73	4
max	77		8		30	14	140	136	145	16

## Sheet: pivot
Row Labels	Count of Part Num
0	1
2	11
3	9
4	3
5	8
6	15
7	12
8	3
Grand Total	62

## Sheet: analysis
summary data with p24
Row Labels	Count of Total
F	29	0.467742
M	33	0.532258
Grand Total	62	1
Row Labels	Count of Total
Omnivore high	14	0.225806
Omnivore low	17	0.274194
Pescatarian	10	0.16129
Vegan	14	0.225806
Vegetarian	7	0.112903
Grand Total	62	1
Row Labels	Count of Yrs diet		Row Labels	Average of Yrs diet
Omnivore high			Omnivore high
Omnivore low			Omnivore low
Pescatarian	7	0.7	Pescatarian	18.8571
Vegan	10	0.714286	Vegan	3.3
Vegetarian	5	0.714286	Vegetarian	11.25
Grand Total	22	0.354839	Grand Total	10.0568
Row Labels	Average of Sleep		Row Labels	Average of T1-5		Row Labels	Average of Delayed		Row Labels	Average of Total		Row Labels	Average of Scaled recog
Omnivore high	5.64286		Omnivore high	105.286		Omnivore high	99.4286		Omnivore high	104.714		Omnivore high	9.71429
Omnivore low	4.29412		Omnivore low	110.059		Omnivore low	105.412		Omnivore low	109.529		Omnivore low	10.8235
Pescatarian	4.9		Pescatarian	115.5		Pescatarian	116.2		Pescatarian	118.2		Pescatarian	11.6
Vegan	4.64286		Vegan	113.571		Vegan	115.214		Vegan	116		Vegan	12.1429
Vegetarian	7.14286		Vegetarian	116.286		Vegetarian	116.429		Vegetarian	117.571		Vegetarian	13.4286
Grand Total	5.09677		Grand Total	111.355		Grand Total	109.258		Grand Total	112.21		Grand Total	11.2903
Row Labels	StdDev of Sleep		Row Labels	StdDev of T1-5		Row Labels	StdDev of Delayed		Row Labels	StdDev of Total		Row Labels	StdDev of Scaled recog
Omnivore high	2.8718		Omnivore high	18.5656		Omnivore high	18.3794		Omnivore high	18.1804		Omnivore high	3.26823
Omnivore low	2.86716		Omnivore low	14.263		Omnivore low	15.3788		Omnivore low	14.7526		Omnivore low	2.55527
Pescatarian	2.92309		Pescatarian	15.672		Pescatarian	15.7042		Pescatarian	17.5803		Pescatarian	2.75681
Vegan	2.7346		Vegan	14.6272		Vegan	14.1159		Vegan	14.4914		Vegan	3.20713
Vegetarian	3.93398		Vegetarian	10.9043		Vegetarian	17.6433		Vegetarian	14.1993		Vegetarian	3.10146
Grand Total	3.01205		Grand Total	15.3624		Grand Total	17.0803		Grand Total	16.2815		Grand Total	3.0962
Average of Educ level	Column Labels
Row Labels	F	M	Grand Total
Omnivore high	5.66667	4.81818	5
Omnivore low	6	4.36364	4.94118
Pescatarian	5.14286	5.66667	5.3
Vegan	3.88889	3.6	3.78571
Vegetarian	4.75	6.66667	5.57143
Grand Total	4.93103	4.72727	4.82258
Average of Age Yrs	Column Labels
Row Labels	F	M	Grand Total
Omnivore high	62	52.8182	54.7857
Omnivore low	66.6667	53.4545	58.1176
Pescatarian	51.8571	58	53.7
Vegan	55.1111	50.8	53.5714
Vegetarian	54	59.6667	56.4286
Grand Total	57.2759	53.8182	55.4355								source:	http://www.imaner.net/panel/profile.htm						https://www.vegansociety.com/about-us/further-information/key-facts?_ga=2.256171595.1914551236.1565960288-847638596.1565960288
												Vegan research panel						Vegan society surveys - England, Scotland and Wales
Count of Part Num	Column Labels				Count of Part Num	Column Labels					Vegan demographics
Row Labels	F	M	Grand Total		Row Labels	F	M	Grand Total			Most likely to be female and under 35. (Source: Survey 7)							2014	0.0025
Omnivore high	3	11	14		Omnivore high	0.103448	0.333333	0.225806										2016	0.0046
Omnivore low	6	11	17		Omnivore low	0.206897	0.333333	0.274194			Gender:	Vegans	UK Vegans	USA Vegans				2018	0.0116
Pescatarian	7	3	10		Pescatarian	0.241379	0.0909091	0.16129			Male	0.33	0.36	0.22
Vegan	9	5	14		Vegan	0.310345	0.151515	0.225806			Female	0.67	0.64	0.78
Vegetarian	4	3	7		Vegetarian	0.137931	0.0909091	0.112903
Grand Total	29	33	62		Grand Total	1	1	1			Age:	Vegans	UK Vegans	USA Vegans				https://www.vegsoc.org/info-hub/facts-and-figures/
											16-24	0.21	0.14	0.36				Vegetarian Society
											25-34	0.4	0.39	0.44
Average of Delayed	Column Labels										35-44	0.25	0.32	0.11				2% - 3%	Proportion of UK who are veget or vegan 100% of the time
Row Labels	F	M	Grand Total								45-54	0.1	0.11	0.07
Omnivore high	117.333	94.5455	99.4286								55+	0.04	0.04	0.02
Omnivore low	118.667	98.1818	105.412
Pescatarian	119.143	109.333	116.2
Vegan	118.222	109.8	115.214
Vegetarian	115.5	117.667	116.429
Grand Total	118.069	101.515	109.258
Count of Part Num	Column Labels
Educ level	F	M	Grand Total		Educ level	F	M	Grand Total
0		1	1		0	0	0.030303	0.016129
2	4	7	11		2	0.137931	0.212121	0.177419
3	5	4	9		3	0.172414	0.121212	0.145161
4	3		3		4	0.103448	0	0.0483871
5	2	6	8		5	0.0689655	0.181818	0.129032
6	9	6	15		6	0.310345	0.181818	0.241935
7	4	8	12		7	0.137931	0.242424	0.193548
8	2	1	3		8	0.0689655	0.030303	0.0483871
Grand Total	29	33	62		Grand Total	1	1	1

## Sheet: tables graphs
tables and graphs for report
	Delayed recall																Delayed recall			Delayed recall		mean			Delayed recall		SD
Diet	Mean			SD												Diet	Mean	SD		Diet	F	M	Grand Total		Diet	F	M	Grand Total
Omnivore high	99.4286			18.3794												Omnivore high	99.4286	18.3794		Omnivore high	117.333	94.5455	99.4286		Omnivore high	10.4083	17.1777	18.3794
Omnivore low	105.412			15.3788												Omnivore low	105.412	15.3788		Omnivore low	118.667	98.1818	105.412		Omnivore low	8.75595	13.3103	15.3788
Pescatarian	116.2			15.7042												Pescatarian	116.2	15.7042		Pescatarian	119.143	109.333	116.2		Pescatarian	16.2422	14.7422	15.7042
Vegetarian	116.429			17.6433												Vegetarian	116.429	17.6433		Vegan	118.222	109.8	115.214		Vegan	11.0315	18.6333	14.1159
Vegan	115.214			14.1159												Vegan	115.214	14.1159		Vegetarian	115.5	117.667	116.429		Vegetarian	22.6495	12.6623	17.6433
Grand Total	109.258			17.0803												Grand Total	109.258	17.0803		Grand Total	118.069	101.515	109.258		Grand Total	13.0026	16.6135	17.0803
	Total recall																Total recall			Total recall		mean			Total recall		SD
Diet	Mean			SD												Diet	Mean	SD		Diet	F	M	Grand Total		Diet	F	M	Grand Total
Omnivore high	104.714			18.1804												Omnivore high	104.714	18.1804		Omnivore high	124.333	99.3636	104.714		Omnivore high	4.16333	16.7109	18.1804
Omnivore low	109.529			14.7526												Omnivore low	109.529	14.7526		Omnivore low	121.667	102.909	109.529		Omnivore low	8.5479	13.2322	14.7526
Pescatarian	118.2			17.5803												Pescatarian	118.2	17.5803		Pescatarian	121.571	110.333	118.2		Pescatarian	18.902	13.6504	17.5803
Vegetarian	117.571			14.1993												Vegetarian	117.571	14.1993		Vegan	119.556	109.6	116		Vegan	10.5961	19.4499	14.4914
Vegan	116			14.4914												Vegan	116	14.4914		Vegetarian	116	119.667	117.571		Vegetarian	18.7439	8.14453	14.1993
Grand Total	112.21			16.2815												Grand Total	112.21	16.2815		Grand Total	120.483	104.939	112.21		Grand Total	12.8803	15.6084	16.2815
	Y/N Recognition discrimination																Y/N Recognition discrimination			Y/N Recognition		mean			Y/N Recognition		SD
Diet	Mean			SD												Diet	Mean	SD		Diet	F	M	Grand Total		Diet	F	M	Grand Total
Omnivore high	9.71429			3.26823												Omnivore high	9.71429	3.26823		Omnivore high	11	9.36364	9.71429		Omnivore high	0	3.64068	3.26823
Omnivore low	10.8235			2.55527												Omnivore low	10.8235	2.55527		Omnivore low	12.6667	9.81818	10.8235		Omnivore low	2.33809	2.13627	2.55527
Pescatarian	11.6			2.75681												Pescatarian	11.6	2.75681		Pescatarian	12.4286	9.66667	11.6		Pescatarian	2.63674	2.3094	2.75681
Vegetarian	13.4286			3.10146												Vegetarian	13.4286	3.10146		Vegan	12.4444	11.6	12.1429		Vegan	3.6094	2.60768	3.20713
Vegan	12.1429			3.20713												Vegan	12.1429	3.20713		Vegetarian	12.25	15	13.4286		Vegetarian	3.77492	1	3.10146
Grand Total	11.7742			4.77843												Grand Total	11.3	4.77843		Grand Total	12.3103	10.3939	11.2903		Grand Total	2.81708	3.09172	3.0962
	Sleep quality																Sleep quality			Sleep quality		Mean			Sleep quality		SD
Diet	Mean			SD												Diet	Mean	SD		Diet	F	M	Grand Total		Diet	F	M	Grand Total
Omnivore high	5.64286			2.8718												Omnivore high	5.64286	2.8718		Omnivore high	5	5.81818	5.64286		Omnivore high	1	3.21926	2.8718
Omnivore low	4.29412			2.86716												Omnivore low	4.29412	2.86716		Omnivore low	2.83333	5.09091	4.29412		Omnivore low	2.2286	2.94803	2.86716
Pescatarian	4.9			2.92309												Pescatarian	4.9	2.92309		Pescatarian	4.57143	5.66667	4.9		Pescatarian	3.04725	3.05505	2.92309
Vegetarian	7.14286			3.93398												Vegetarian	7.14286	3.93398		Vegan	4.66667	4.6	4.64286		Vegan	3.42783	0.894427	2.7346
Vegan	4.64286			2.7346												Vegan	4.64286	2.7346		Vegetarian	6	8.66667	7.14286		Vegetarian	3.55903	4.6188	3.93398
Grand Total	5.09677			3.01205												Grand Total	5.09677	3.01205		Grand Total	4.48276	5.63636	5.09677		Grand Total	2.93526	3.01888	3.01205
																				Education level		mean			StdDev of Educ level	Column Labels
																				Diet	F	M	Grand Total		Row Labels	F	M	Grand Total
																				Omnivore high	5.66667	4.81818	5		Omnivore high	1.52753	2.48267	2.28709
																				Omnivore low	6	4.36364	4.94118		Omnivore low	0.632456	2.01359	1.81902
																				Pescatarian	5.14286	5.66667	5.3		Pescatarian	2.4103	2.3094	2.26323
																				Vegan	3.88889	3.6	3.78571		Vegan	2.20479	1.81659	2.00686
																				Vegetarian	4.75	6.66667	5.57143		Vegetarian	0.957427	0.57735	1.27242
Count of Part Num	Column Labels																			Grand Total	4.93103	4.72727	4.82258		Grand Total	1.90734	2.15454	2.02868
Age group	F	M	Grand Total		Age group	F	M	Grand Total
40-49	5	13	18		40-49	0.172414	0.393939	0.290323
50-59	15	11	26		50-59	0.517241	0.333333	0.419355
60-69	5	6	11		60-69	0.172414	0.181818	0.177419
70-80	4	3	7		70-80	0.137931	0.0909091	0.112903
Grand Total	29	33	62		Grand Total	1	1	1
Average of Yrs diet	Column Labels
Row Labels	F	M	Grand Total
Omnivore high
Omnivore low
Pescatarian	17.8333	25	18.8571
Vegan	3.58333	2.875	3.3
Vegetarian	12.75	9	11.25
Grand Total	11.1167	7.78571	10.0568
Diet2 * Gender2 Crosstabulation
Count
		Gender2		Total
		0	1
Diet2	0	5	9	14
	1	3	4	7
	2	3	7	10
	3	11	6	17
	4	11	3	14
Total		33	29	62

## Sheet: copy of data
Part Num
1
2	1
3	1
4	1
5	1
6	1
7	1
8	1
9	1
10	1
11	1
12	1
13	1
14	1
15	1
16	1
17	1
18	1
19	1
20	1
21	1
22	1
23	1
25	2
26	1
27	1
28	1
29	1
30	1
31	1
32	1
33	1
34	1
35	1
36	1
37	1
38	1
39	1
40	1
41	1
42	1
43	1
44	1
45	1
46	1
47	1
48	1
49	1
50	1
51	1
52	1
53	1
54	1
55	1
56	1
57	1
58	1
60	2
61	1
