# Supplementary material for: Comparison of Vegan and Non-Vegan Diets on Memory and Sleep Quality
Source: Research Square preprint supplement (doi:10.21203/rs.3.rs-107006/v1), 2020-11-30
Supplement: Supplementary file 4 [file 681cc69ab89be08764bba255.xlsx]

## Sheet: Notes
Part Num	participant number
Age Yrs	age in years
Gender	gender
Educ level	level of education 0 to 7 (ascending in same order as form)
Diet	see below
Yrs diet	number of years on current dietary regime
Sleep	score on PSQI (0 to 21)
T1-5	Scaled index score - trials 1 to 5
Delayed	scaled index score - delayed recall
Total	scaled index score - total recall correct
Scaled recog	scaled Y/N rcognition discrim
Diet category	Vegan	only if stated vegan and Q5, Q6 and Q10 all <1
	Vegetarian	stated vegetarian and Q5 <1 and Q10 <1
	Pescatarian	stated pescatarian and Q5 <1
	Omnivore low
	Omnivore high	Q5 or Q6 or Q10 last box ticked, or Q5 and Q10 second box ticked

## Sheet: Data
Part Num	Age Yrs	Gender	Educ level	Diet	Yrs diet	Sleep	T1-5	Delayed	Total	Scaled recog
41	50	F	4	Vegetarian	1.25	9	95	84	91	7
56	77	F	6	Omnivore low		7	110	117	113	12
47	55	F	8	Vegan	2	4	128	132	132	15
37	54	F	2	Vegan	1	7	105	117	112	15
40	68	F	6	Vegan	8	1	129	129	134	15
42	50	M	2	Vegan	2	5	98	92	96	9
51	47	M	7	Omnivore low		8	95	92	94	11
38	52	F	2	Vegan	3	5	118	115	115	12
44	50	M	3	Vegan	2	3	80	94	87	9
45	59	F	5	Vegetarian		8	114	114	114	12
49	59	M	7	Pescatarian	25	9	104	104	108	7
11	46	M	6	Omnivore low		3	114	99	108	9
5	52	M	2	Omnivore low		11	114	93	106	7
12	68	F	5	Omnivore low		1	135	132	135	12
8	47	F	4	Omnivore high		4	124	114	123	11
17	54	M	5	Omnivore low		1	73	69	73	6
9	60	M	7	Omnivore high		8	93	83	91	9
7	54	F	2	Vegan		1	122	125	129	12
6	52	F	3	Vegan		5	120	123	120	15
52	55	F	6	Vegetarian	17	6	118	132	124	15
13	43	M	2	Omnivore high		6	104	96	103	10
53	52	M	7	Pescatarian		3	99	98	98	11
33	73	M	5	Omnivore high		2	115	121	119	12
14	52	F	2	Pescatarian		10	117	120	117	10
32	71	M	5	Omnivore low		4	114	118	117	13
30	75	F	6	Omnivore high		6	129	109	121	11
16	47	M	3	Omnivore low		5	87	89	87	8
29	45	M	0	Omnivore high		14	104	96	98	11
15	66	M	3	Omnivore low		1	111	93	104	10
28	65	F	6	Omnivore low		2	127	124	128	11
36	46	M	7	Omnivore high		4	92	80	90	4
27	63	M	6	Omnivore low		7	113	113	115	11
4	59	M	6	Omnivore high		7	90	80	86	7
31	64	F	7	Omnivore low		1	118	108	118	10
35	63	M	3	Pescatarian		5	120	126	125	11
34	77	F	6	Omnivore low		3	119	120	122	16
20	45	M	2	Omnivore high		5	67	84	76	7
18	43	M	6	Omnivore high		3	118	117	119	14
21	65	M	5	Omnivore high		5	105	79	101	40
48	47	M	5	Vegan	3.5	5	100	104	106	12
43	53	F	3	Pescatarian	1	3	135	132	139	15
55	45	F	7	Pescatarian	30	3	105	104	107	11
39	51	F	3	Vegan	4.5	5	119	120	121	15
50	64	F	7	Omnivore high		5	123	129	129	11
54	62	M	7	Vegetarian	15	6	114	120	116	15
19	57	M	8	Omnivore high		6	127	121	128	15
46	55	F	6	Vegan		2	104	98	103	6
25	49	M	6	Vegan		5	124	132	127	15
22	38	M	2	Omnivore low		6	111	105	112	10
23	54	M	2	Omnivore low		5	109	106	110	11
26	49	F	6	Omnivore low		3	113	111	114	15
1	77	M	6	Vegetarian		14	120	104	114	16
2	45	M	5	Omnivore high		4	83	83	82	4
3	72	F	3	Pescatarian	30	1	140	136	145	16
10	58	M	2	Vegan	4	5	132	127	132	13
60	52	F	4	Vegetarian	20	1	130	132	135	15
61	42	F	6	Pescatarian	20	3	124	118	124	12
57	43	F	7	Pescatarian	6	5	120	132	129	14
58	40	M	7	Vegetarian	3	6	123	129	129	14
59	50	M	7	Omnivore low		5	108	103	106	12
62	56	F	8	Pescatarian	20	7	91	92	90	9

## Sheet: pivot
Row Labels	StdDev of Delayed
Omnivore high	18.3794
Omnivore low	15.3788
Pescatarian	15.7042
Vegan	14.3701
Vegetarian	17.6433
Grand Total	17.2131

## Sheet: Analysis
Basic stats
2019-08-12
Row Labels	Count of Part Num
F	28
M	33
Grand Total	61
Row Labels	Count of Part Num
0	1
2	11
3	8
4	3
5	8
6	15
7	12
8	3
Grand Total	61
Row Labels	Count of Part Num
Omnivore high	14
Omnivore low	17
Pescatarian	10
Vegan	13
Vegetarian	7
Grand Total	61
Row Labels	Average of Total		Row Labels	StdDev of Total
Omnivore high	104.714		Omnivore high	18.1804
Omnivore low	109.529		Omnivore low	14.7526
Pescatarian	118.2		Pescatarian	17.5803
Vegan	116.462		Vegan	14.9756
Vegetarian	117.571		Vegetarian	14.1993
Grand Total	112.246		Grand Total	16.4141
Row Labels	Average of Scaled recog		Row Labels	StdDev of Scaled recog
Omnivore high	11.8571		Omnivore high	8.73417
Omnivore low	10.8235		Omnivore low	2.55527
Pescatarian	11.6		Pescatarian	2.75681
Vegan	12.5385		Vegan	2.96129
Vegetarian	13.4286		Vegetarian	3.10146
Grand Total	11.8525		Grand Total	4.77785
Row Labels	Average of Sleep		Row Labels	StdDev of Sleep
Omnivore high	5.64286		Omnivore high	2.8718
Omnivore low	4.29412		Omnivore low	2.86716
Pescatarian	4.9		Pescatarian	2.92309
Vegan	4.07692		Vegan	1.801
Vegetarian	7.14286		Vegetarian	3.93398
Grand Total	4.98361		Grand Total	2.9011
Row Labels	Average of Delayed		Row Labels	StdDev of Delayed
Omnivore high	99.4286		Omnivore high	18.3794
Omnivore low	105.412		Omnivore low	15.3788
Pescatarian	116.2		Pescatarian	15.7042
Vegan	116		Vegan	14.3701
Vegetarian	116.429		Vegetarian	17.6433
Grand Total	109.328		Grand Total	17.2131
