# Supplementary material for: Comparison of Vegan and Non-Vegan Diets on Memory and Sleep Quality
Source: Research Square preprint supplement (doi:10.21203/rs.3.rs-107006/v1), 2020-11-30
Supplement: Supplementary file 5 [file 980a883ab2d7e6534f44d7dc.docx]

**Comparison of Vegan and Non-Vegan Diets on Memory and Sleep Quality**

**Corresponding Author: Pinar Sengul**

**Affiliation: Birkbeck College, University of London, London, UK**

Participant Num,Age Years of Diet,Gender2,Educ level,Diet2,Yrs diet,Sleep,T1-5,Delayed,Total,Scaled recognition

8,47,1,4,4,,4,124,114,123,11

30,75,1,6,4,,6,129,109,121,11

50,64,1,7,4,,5,123,129,129,11

9,60,0,7,4,,8,93,83,91,9

13,43,0,2,4,,6,104,96,103,10

33,73,0,5,4,,2,115,121,119,12

29,45,0,0,4,,14,104,96,98,11

36,46,0,7,4,,4,92,80,90,4

4,59,0,6,4,,7,90,80,86,7

20,45,0,2,4,,5,67,84,76,7

18,43,0,6,4,,3,118,117,119,14

21,65,0,5,4,,5,105,79,101,40

19,57,0,8,4,,6,127,121,128,15

2,45,0,5,4,,4,83,83,82,4

56,77,1,6,3,,7,110,117,113,12

12,68,1,5,3,,1,135,132,135,12

28,65,1,6,3,,2,127,124,128,11

31,64,1,7,3,,1,118,108,118,10

34,77,1,6,3,,3,119,120,122,16

26,49,1,6,3,,3,113,111,114,15

51,47,0,7,3,,8,95,92,94,11

11,46,0,6,3,,3,114,99,108,9

5,52,0,2,3,,11,114,93,106,7

17,54,0,5,3,,1,73,69,73,6

32,71,0,5,3,,4,114,118,117,13

16,47,0,3,3,,5,87,89,87,8

15,66,0,3,3,,1,111,93,104,10

27,63,0,6,3,,7,113,113,115,11

22,38,0,2,3,,6,111,105,112,10

23,54,0,2,3,,5,109,106,110,11

59,50,0,7,3,,5,108,103,106,12

14,52,1,2,2,,10,117,120,117,10

43,53,1,3,2,1,3,135,132,139,15

55,45,1,7,2,30,3,105,104,107,11

3,72,1,3,2,30,1,140,136,145,16

61,42,1,6,2,20,3,124,118,124,12

57,43,1,7,2,6,5,120,132,129,14

62,56,1,8,2,20,7,91,92,90,9

49,59,0,7,2,25,9,104,104,108,7

53,52,0,7,2,,3,99,98,98,11

35,63,0,3,2,,5,120,126,125,11

47,55,1,8,0,2,4,128,132,132,15

37,54,1,2,0,1,7,105,117,112,15

40,68,1,6,0,8,1,129,129,134,15

38,52,1,2,0,3,5,118,115,115,12

7,54,1,2,0,,1,122,125,129,12

6,52,1,3,0,,5,120,123,120,15

39,51,1,3,0,4.5,5,119,120,121,15

46,55,1,6,0,,2,104,98,103,6

42,50,0,2,0,2,5,98,92,96,9

44,50,0,3,0,2,3,80,94,87,9

48,47,0,5,0,3.5,5,100,104,106,12

25,49,0,6,0,,5,124,132,127,15

10,58,0,2,0,4,5,132,127,132,13

41,50,1,4,1,1.25,9,95,84,91,7

45,59,1,5,1,,8,114,114,114,12

52,55,1,6,1,17,6,118,132,124,15

60,52,1,4,1,20,1,130,132,135,15

54,62,0,7,1,15,6,114,120,116,15

1,77,0,6,1,,14,120,104,114,16

58,40,0,7,1,3,6,123,129,129,14
